# Supplementary material for: Long noncoding RNA TINCR is a novel regulator of human bronchial epithelial cell differentiation state
Source: PubMed Central journal article supplement (PMC7851438; doi:10.14814/phy2.14727), 2021-02-01

# Supplement Figure.S1

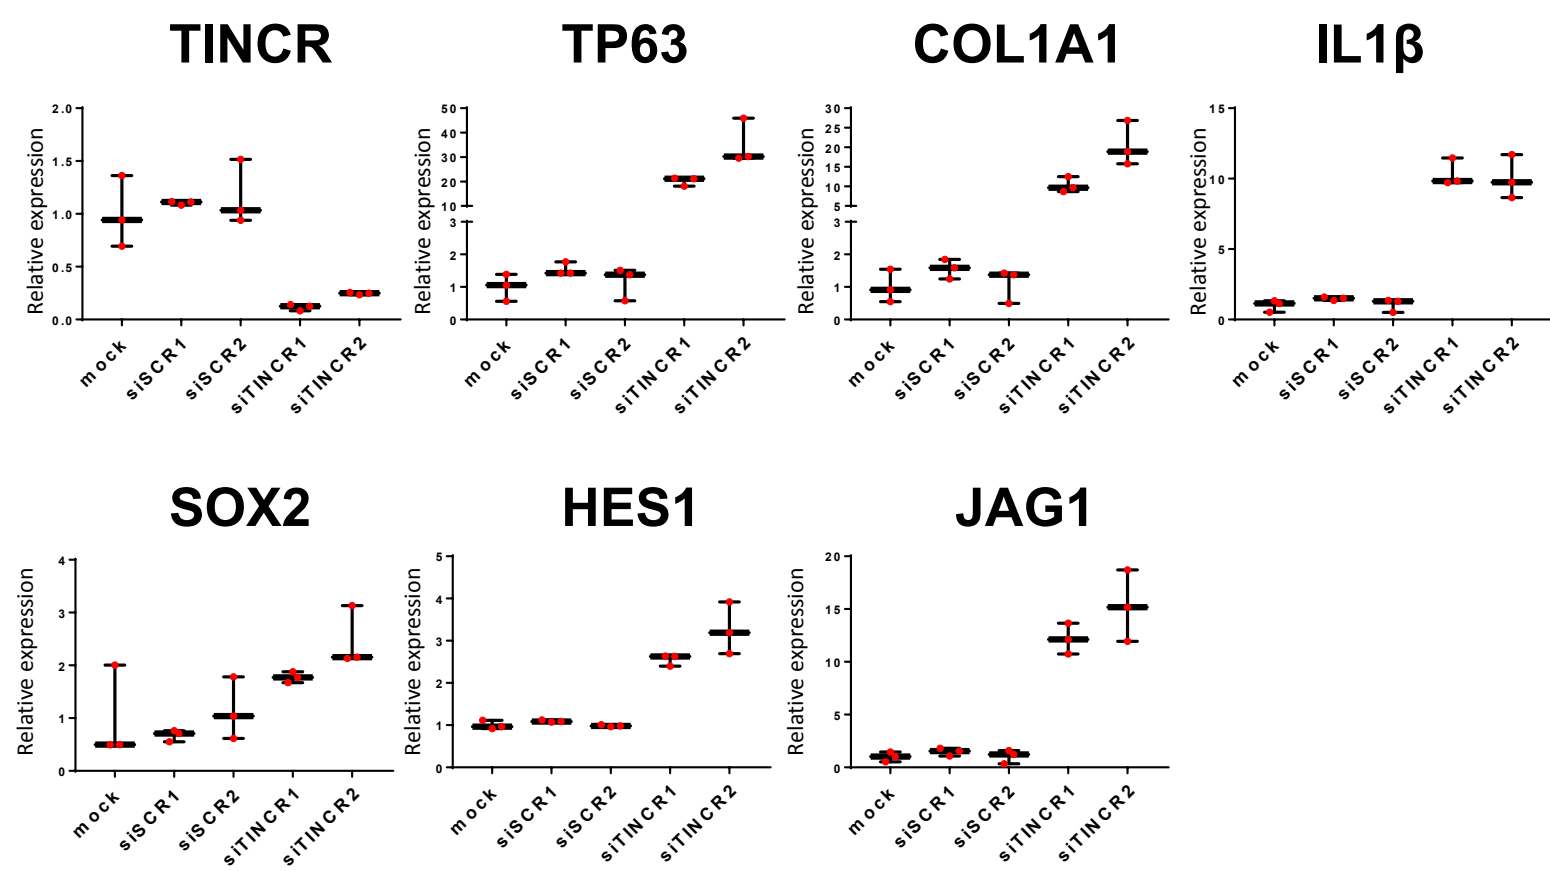

# Supplement Figure.S2

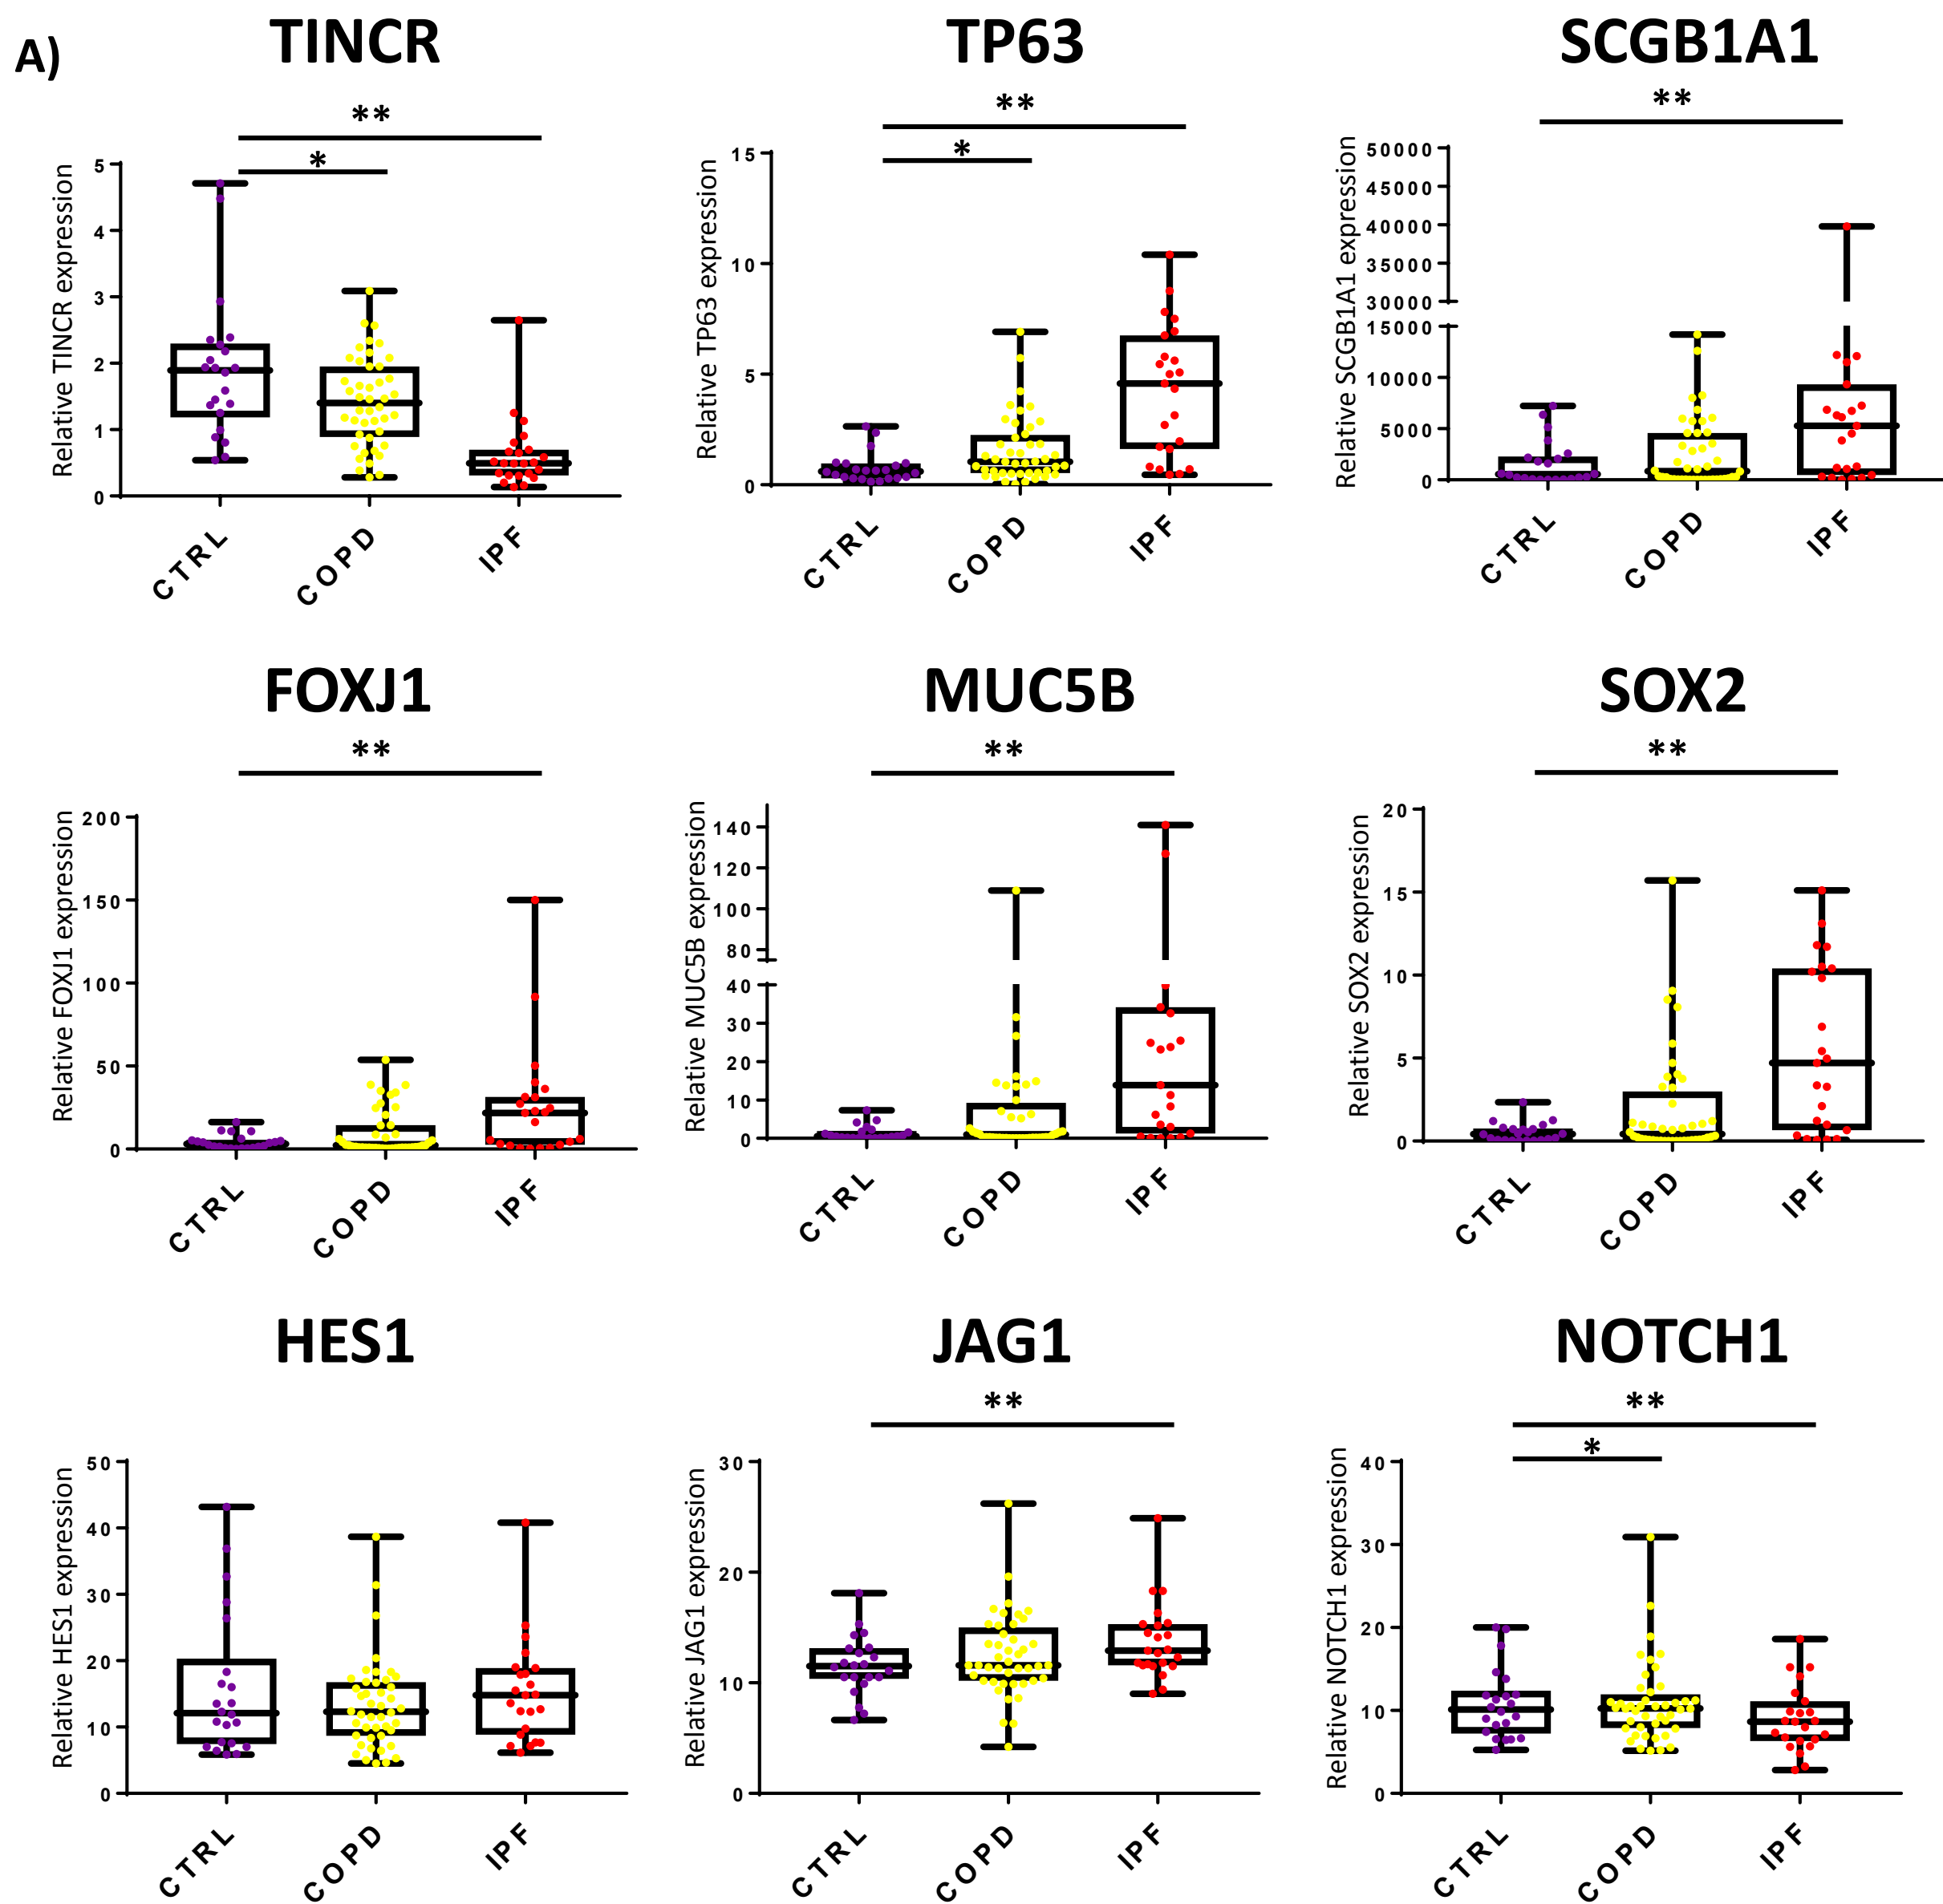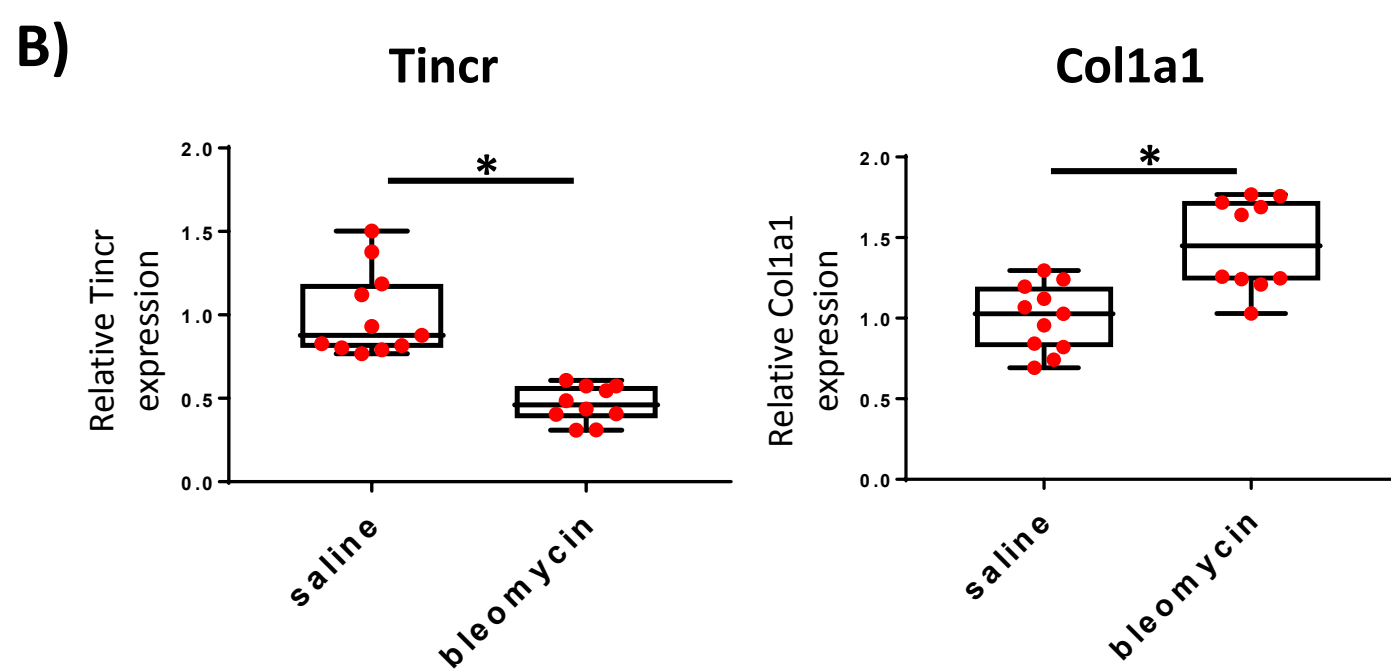

# Supplement Figure.S3

A)

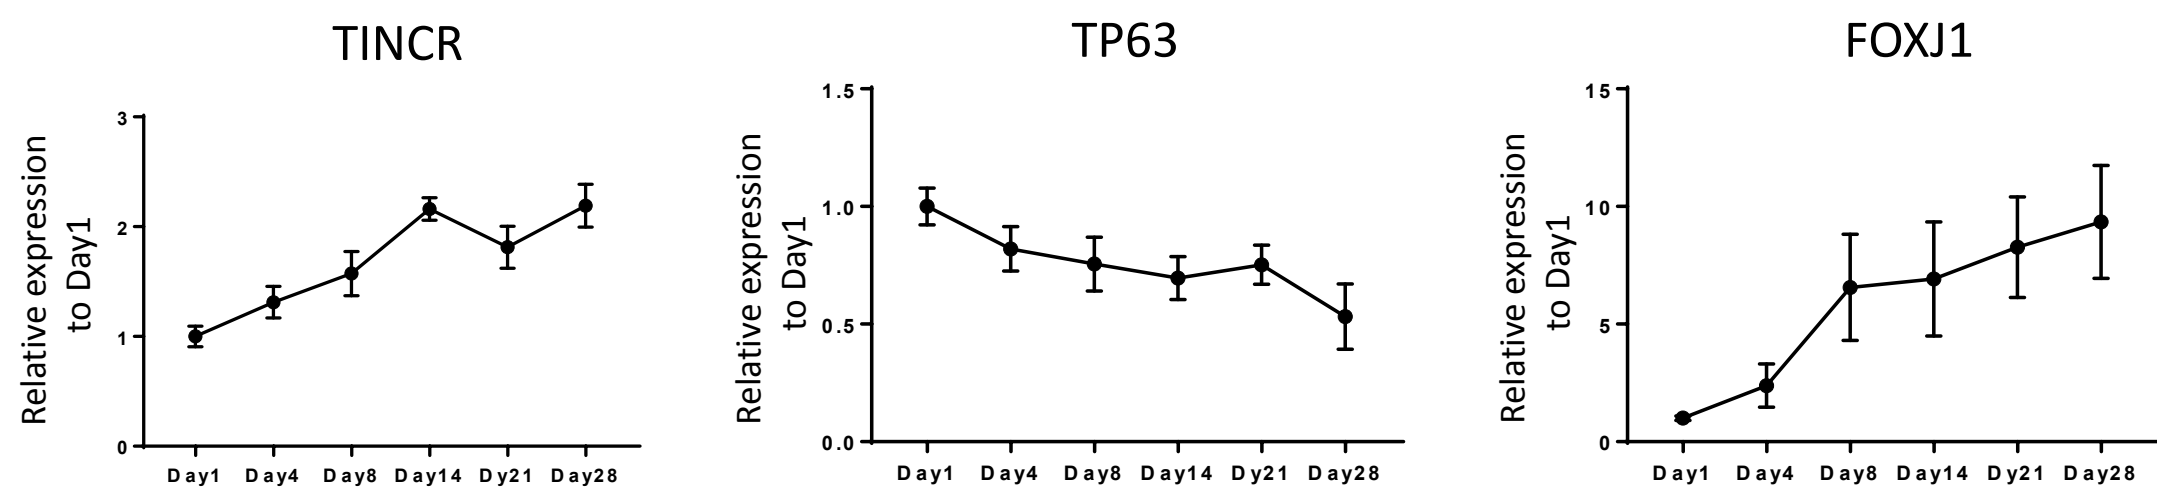

B)

## ALI culture model

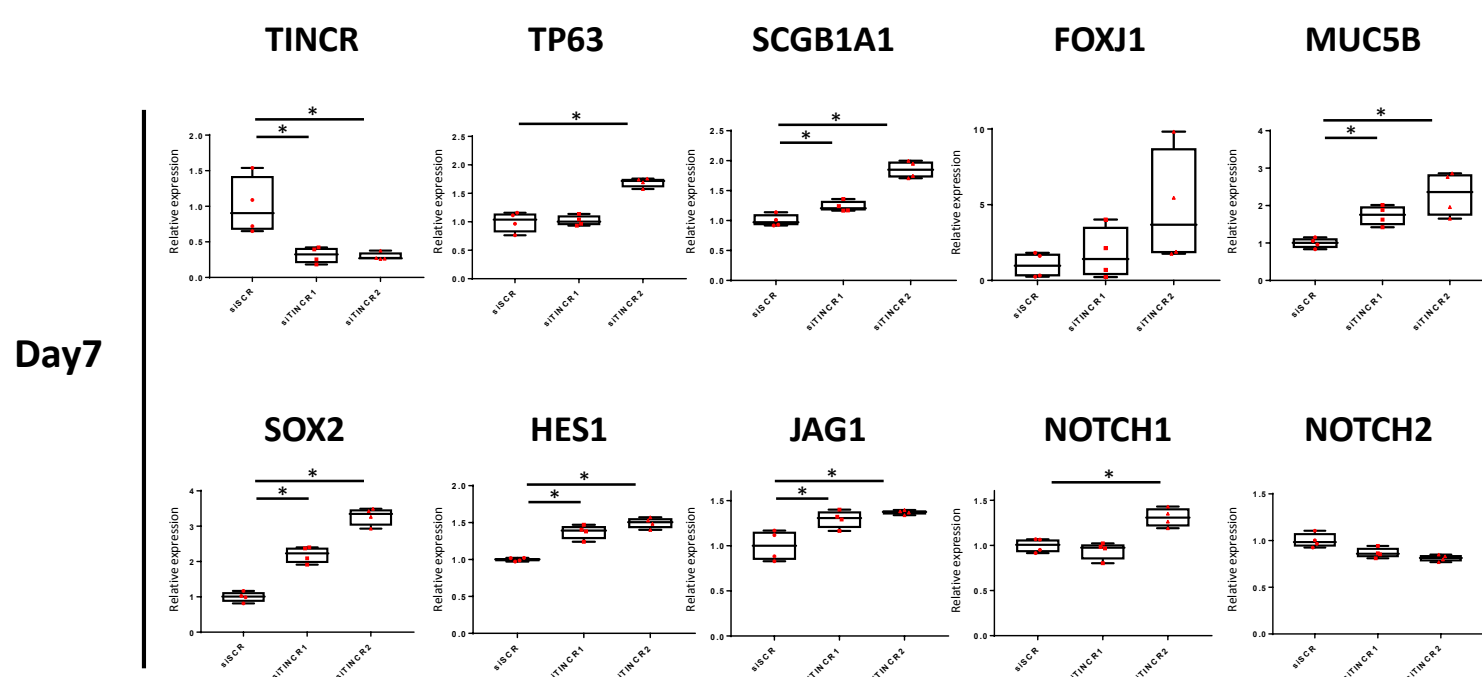

C)

## 3D organoid formation assay

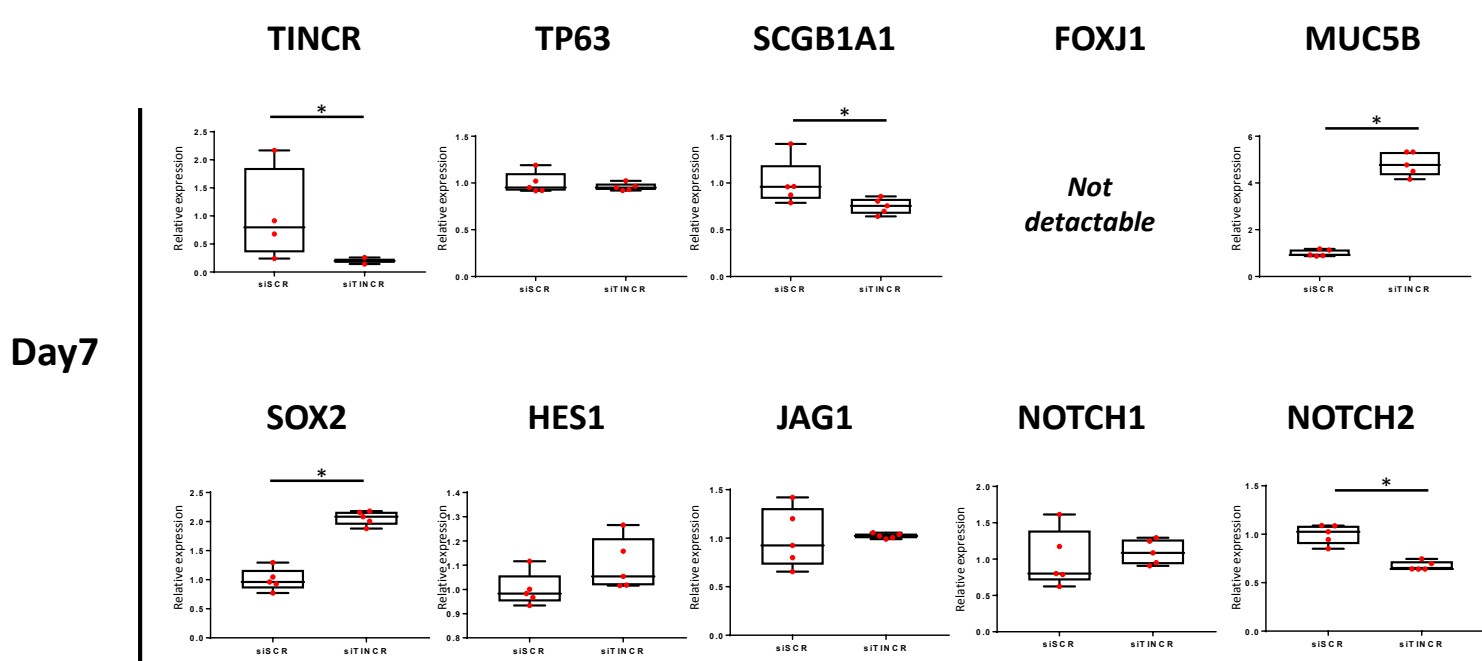

Supplement Figure.S4

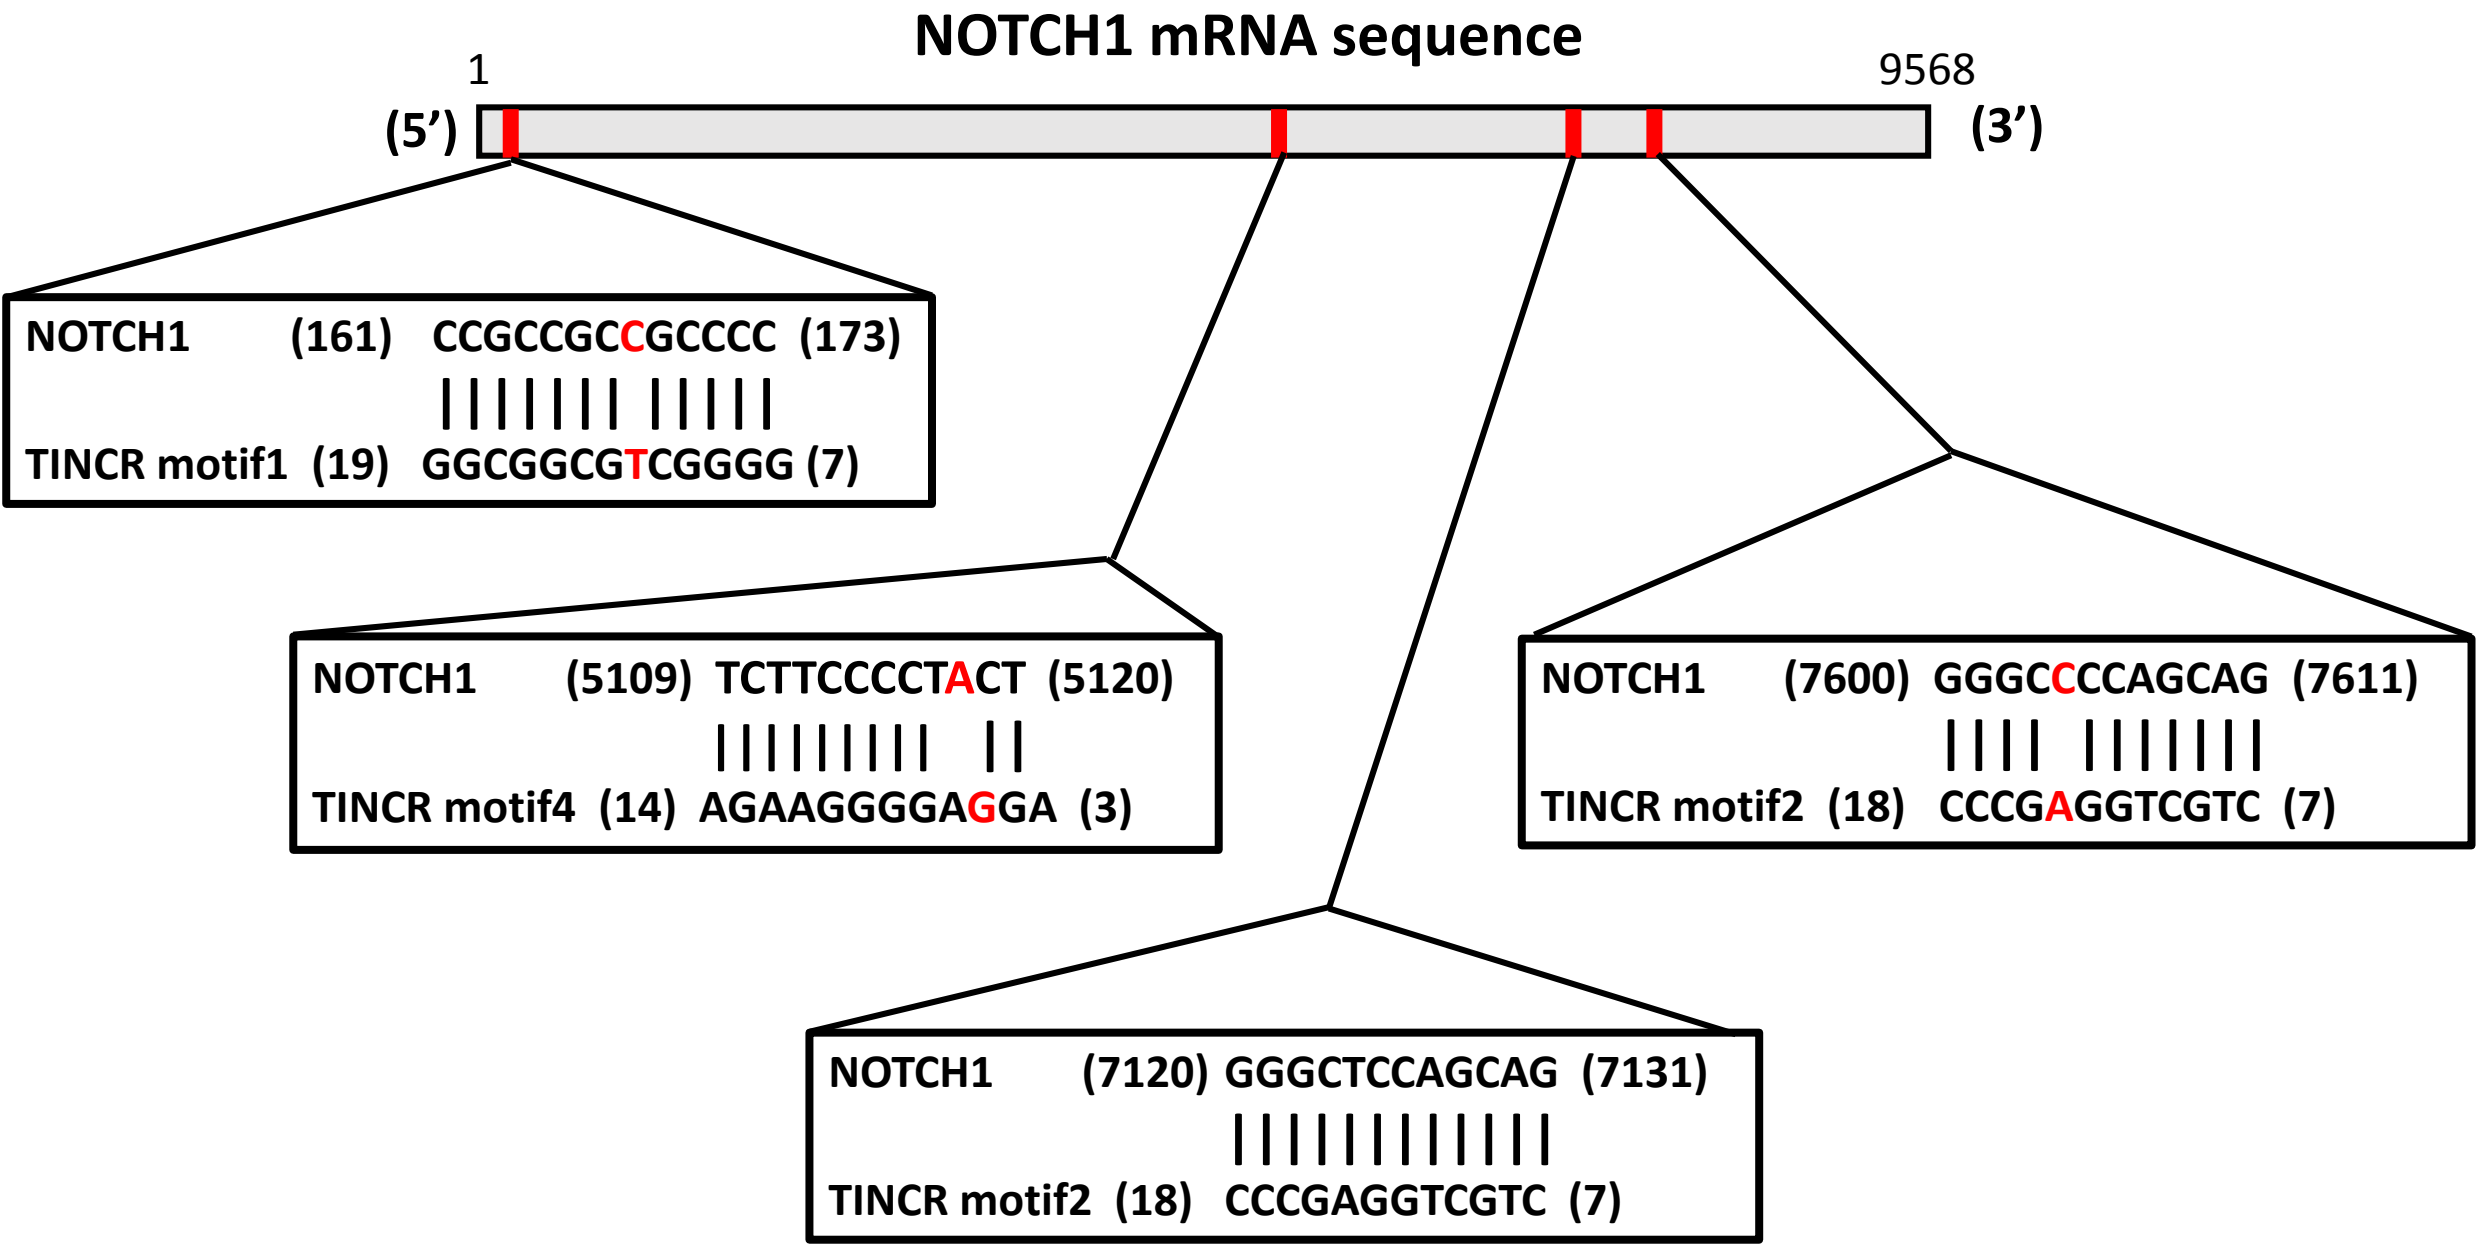

# Supplement Figure.S5

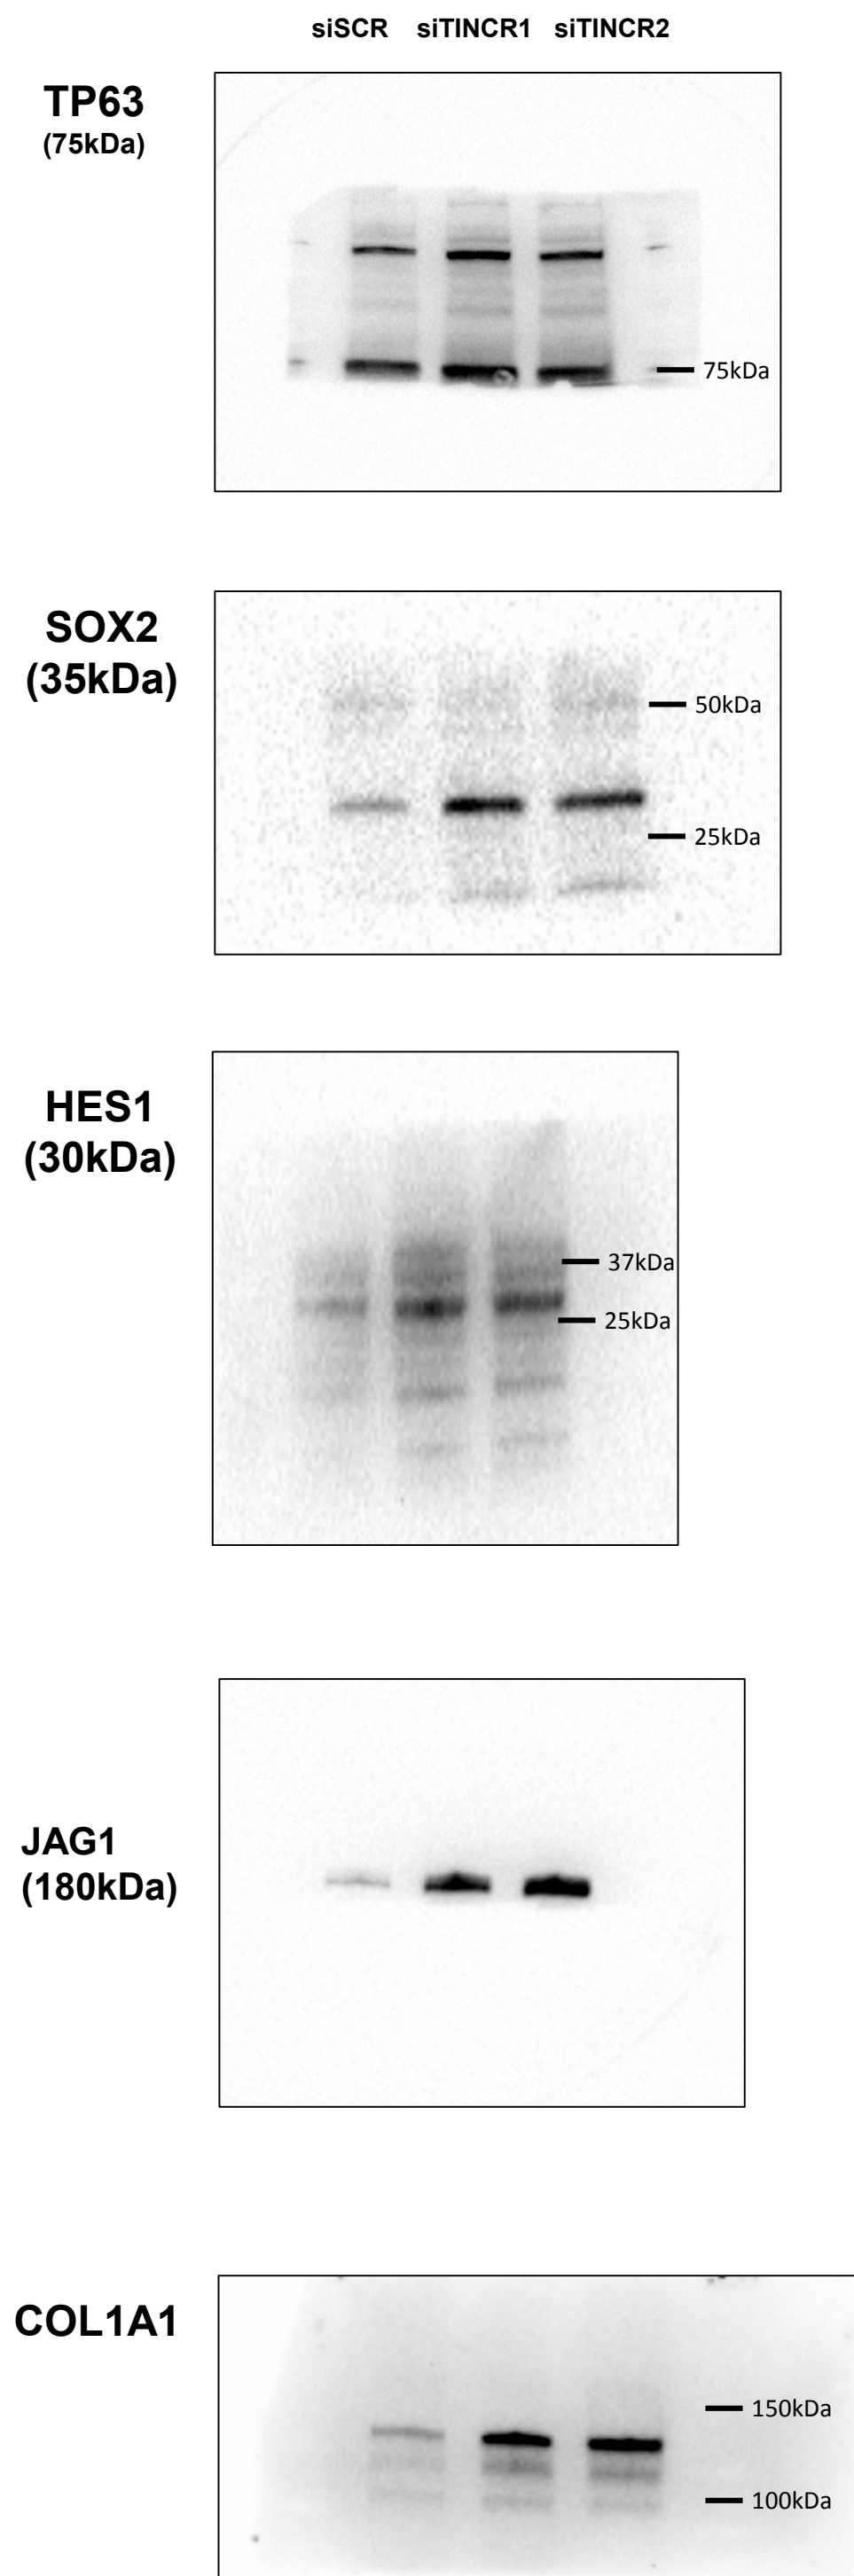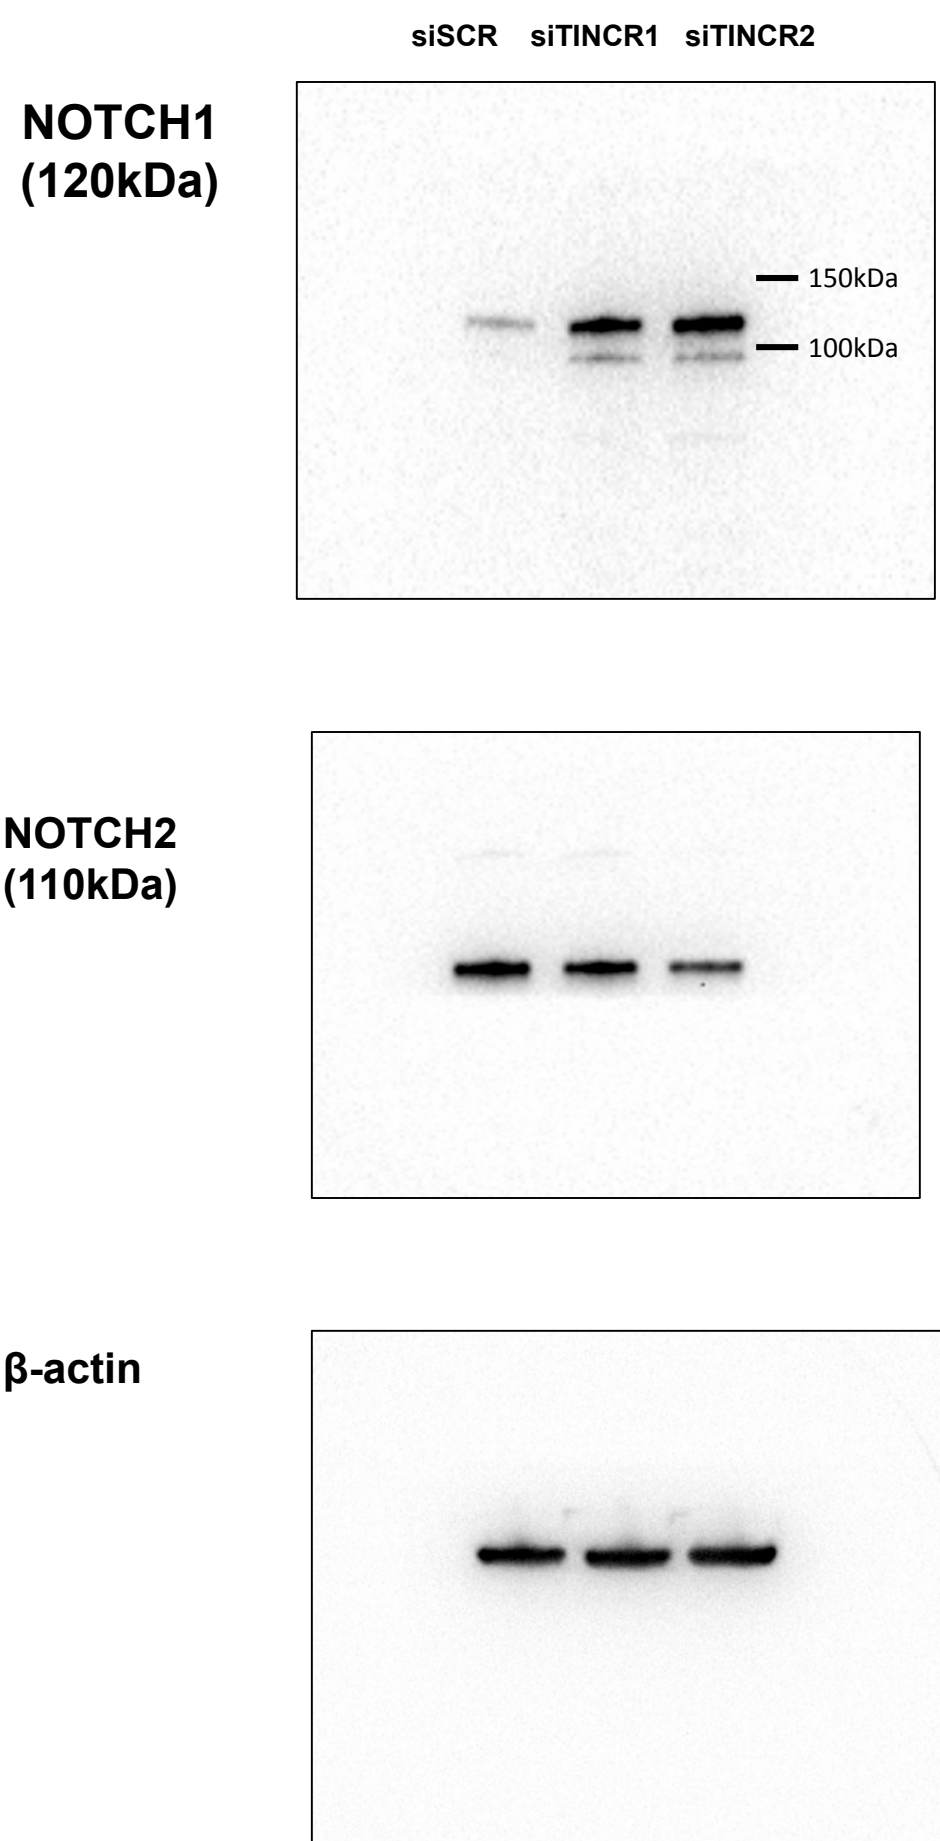

**FN1**

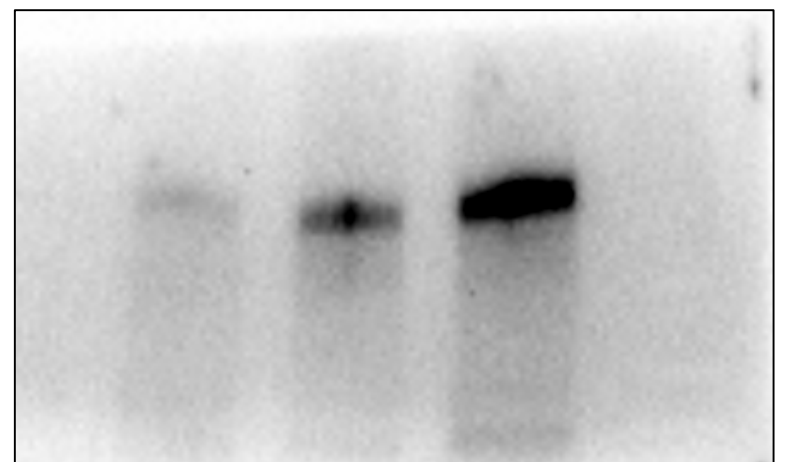

# Supplement Figure.S6

|                     |   |   |   |   |
|---------------------|---|---|---|---|
| pcDNA3.1-EGFP       | + | + | - | - |
| pcDNA3.1-EGFP-TINCR | - | - | + | + |

**TP63**  
(75kDa)

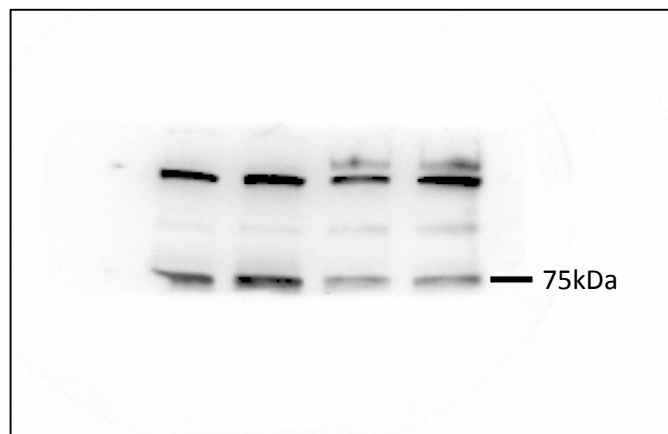

**SOX2**  
(35kDa)

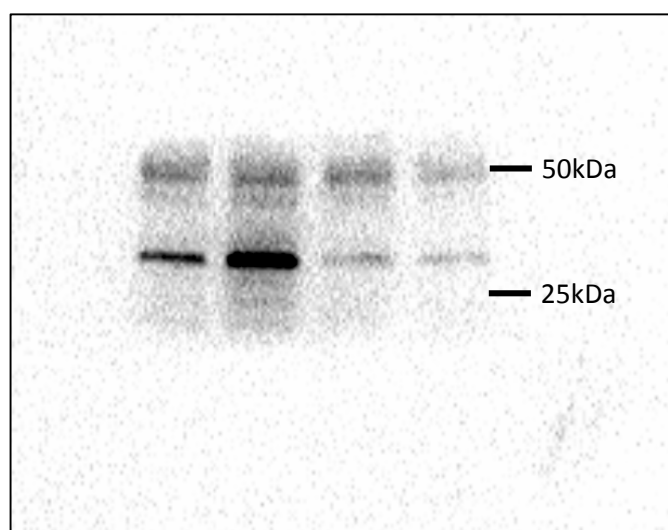

**HES1**  
(30kDa)

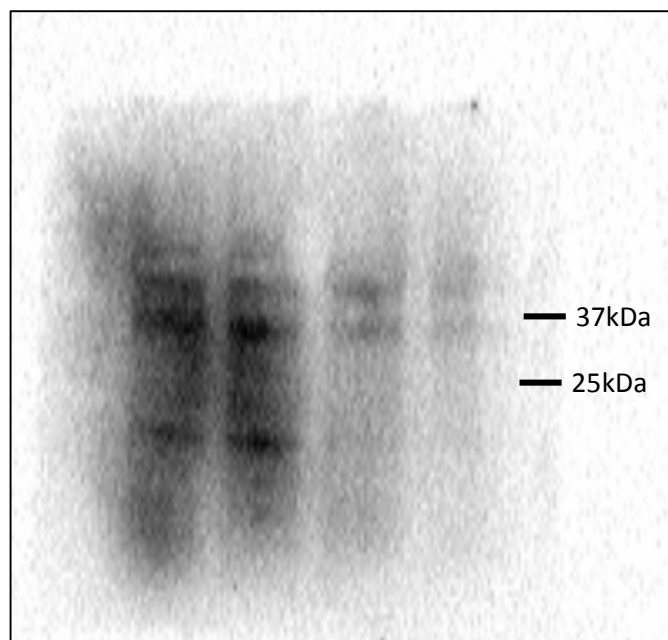

**JAG1**  
(180kDa)

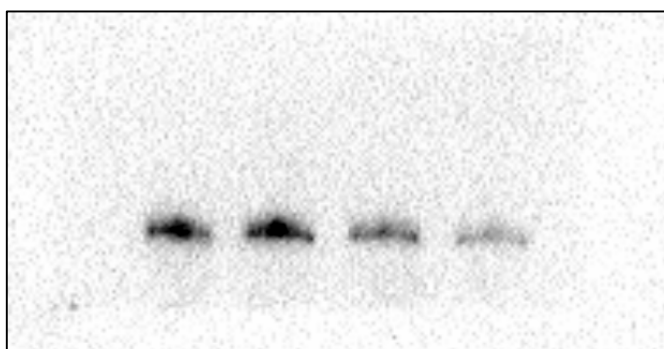

|                     |   |   |   |   |
|---------------------|---|---|---|---|
| pcDNA3.1-EGFP       | + | + | - | - |
| pcDNA3.1-EGFP-TINCR | - | - | + | + |

**NOTCH1**  
(120kDa)

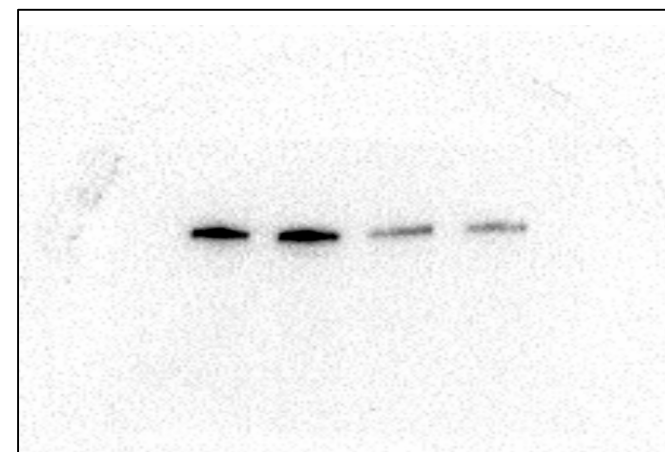

**NOTCH2**  
(110kDa)

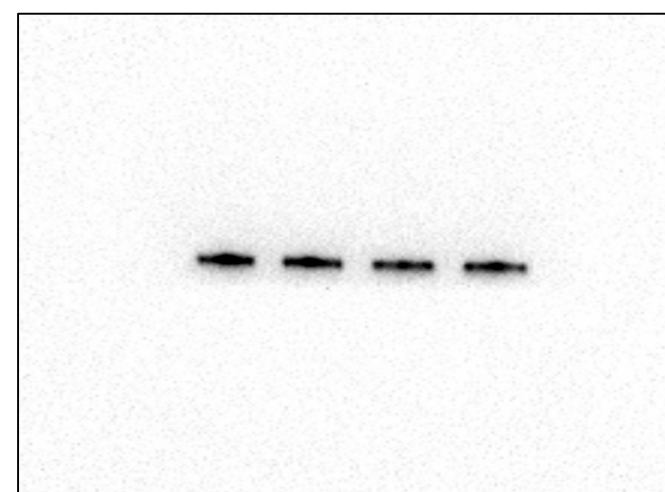

**β-actin**

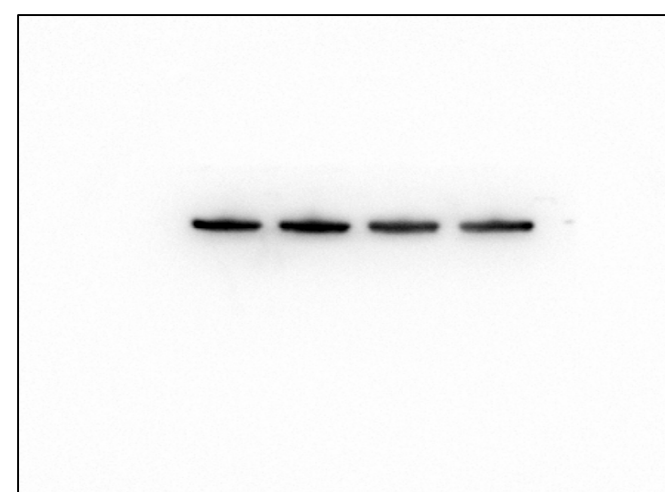

**FN1**

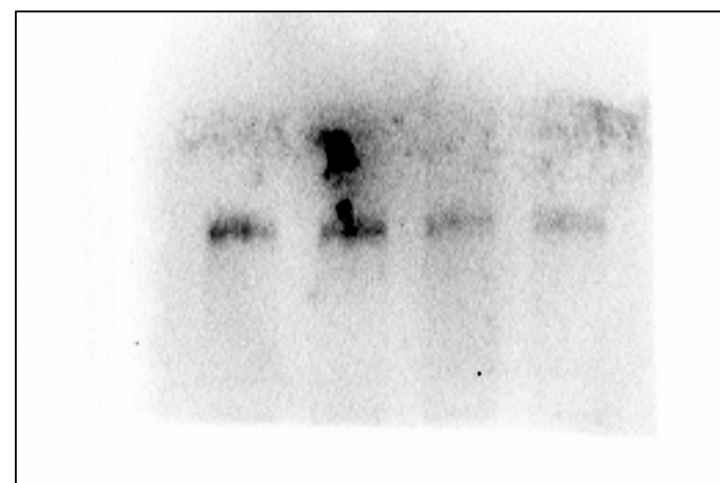

# Supplement Figure.S7

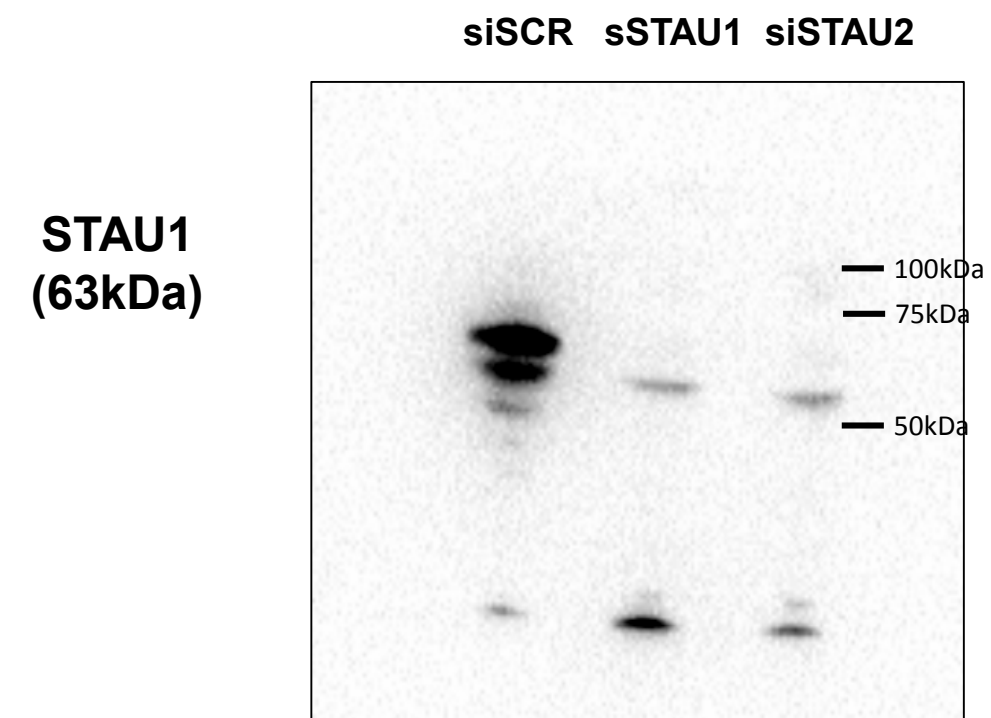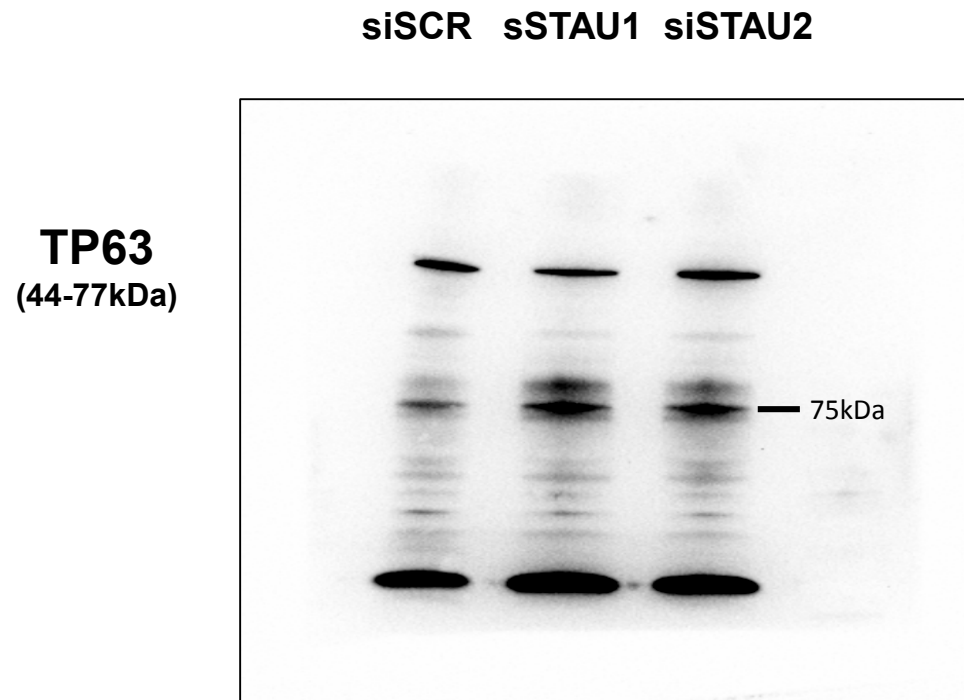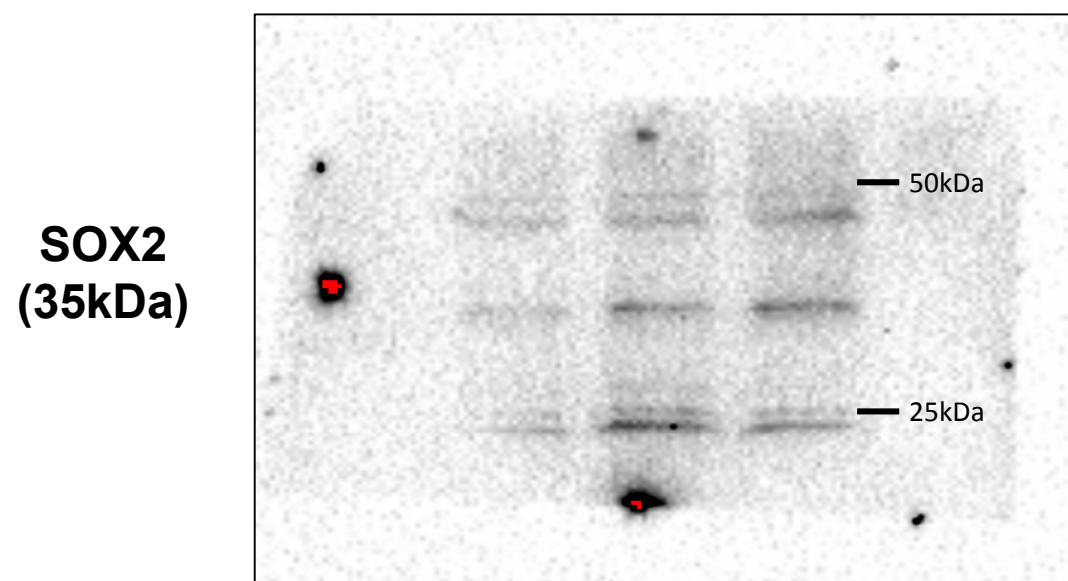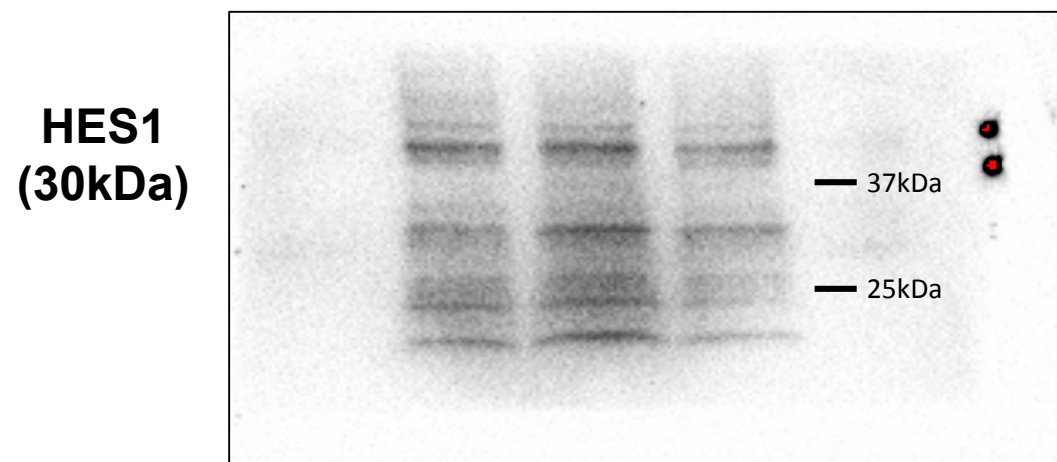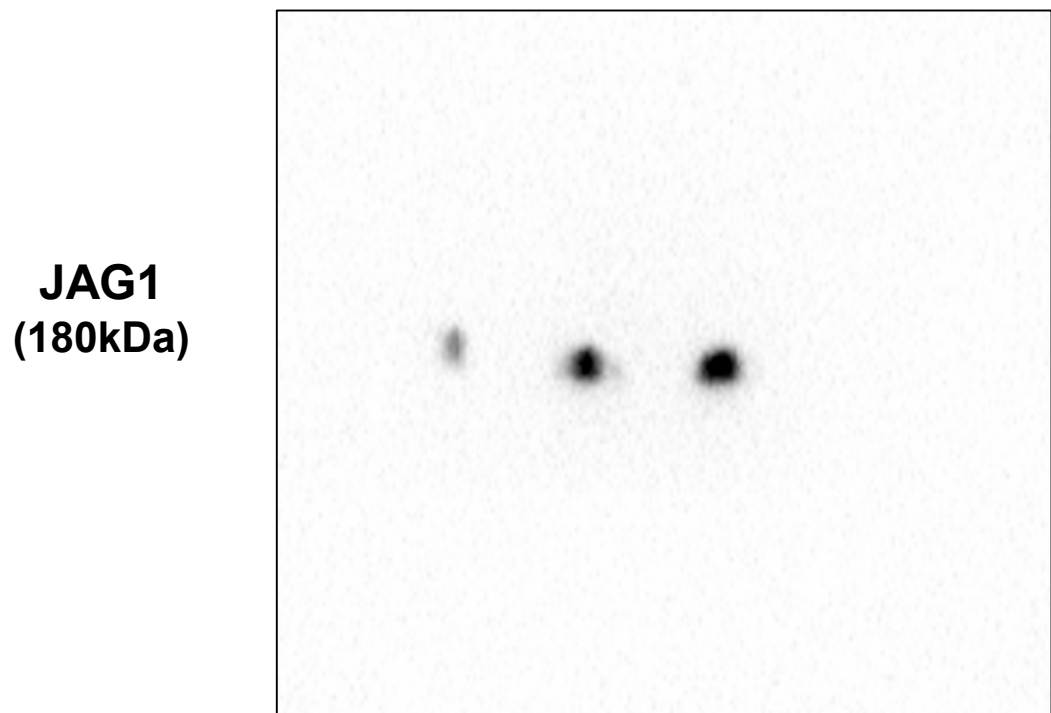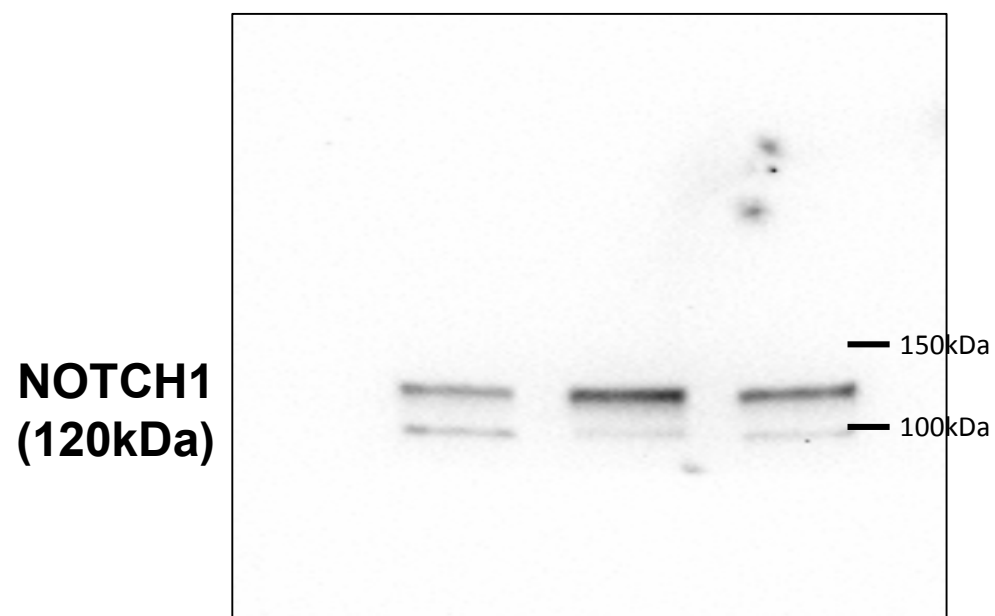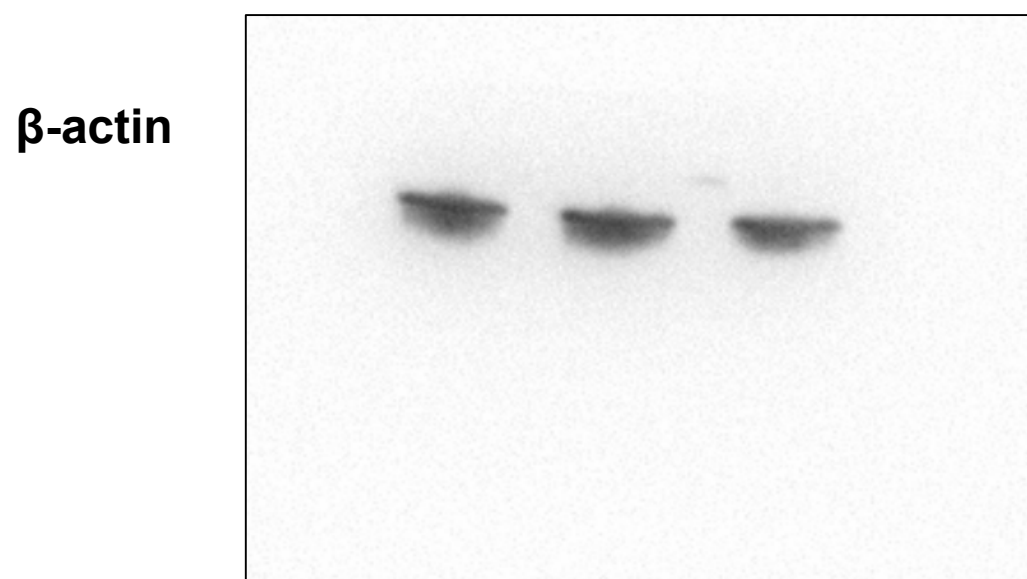

# Supplement Figure.S8

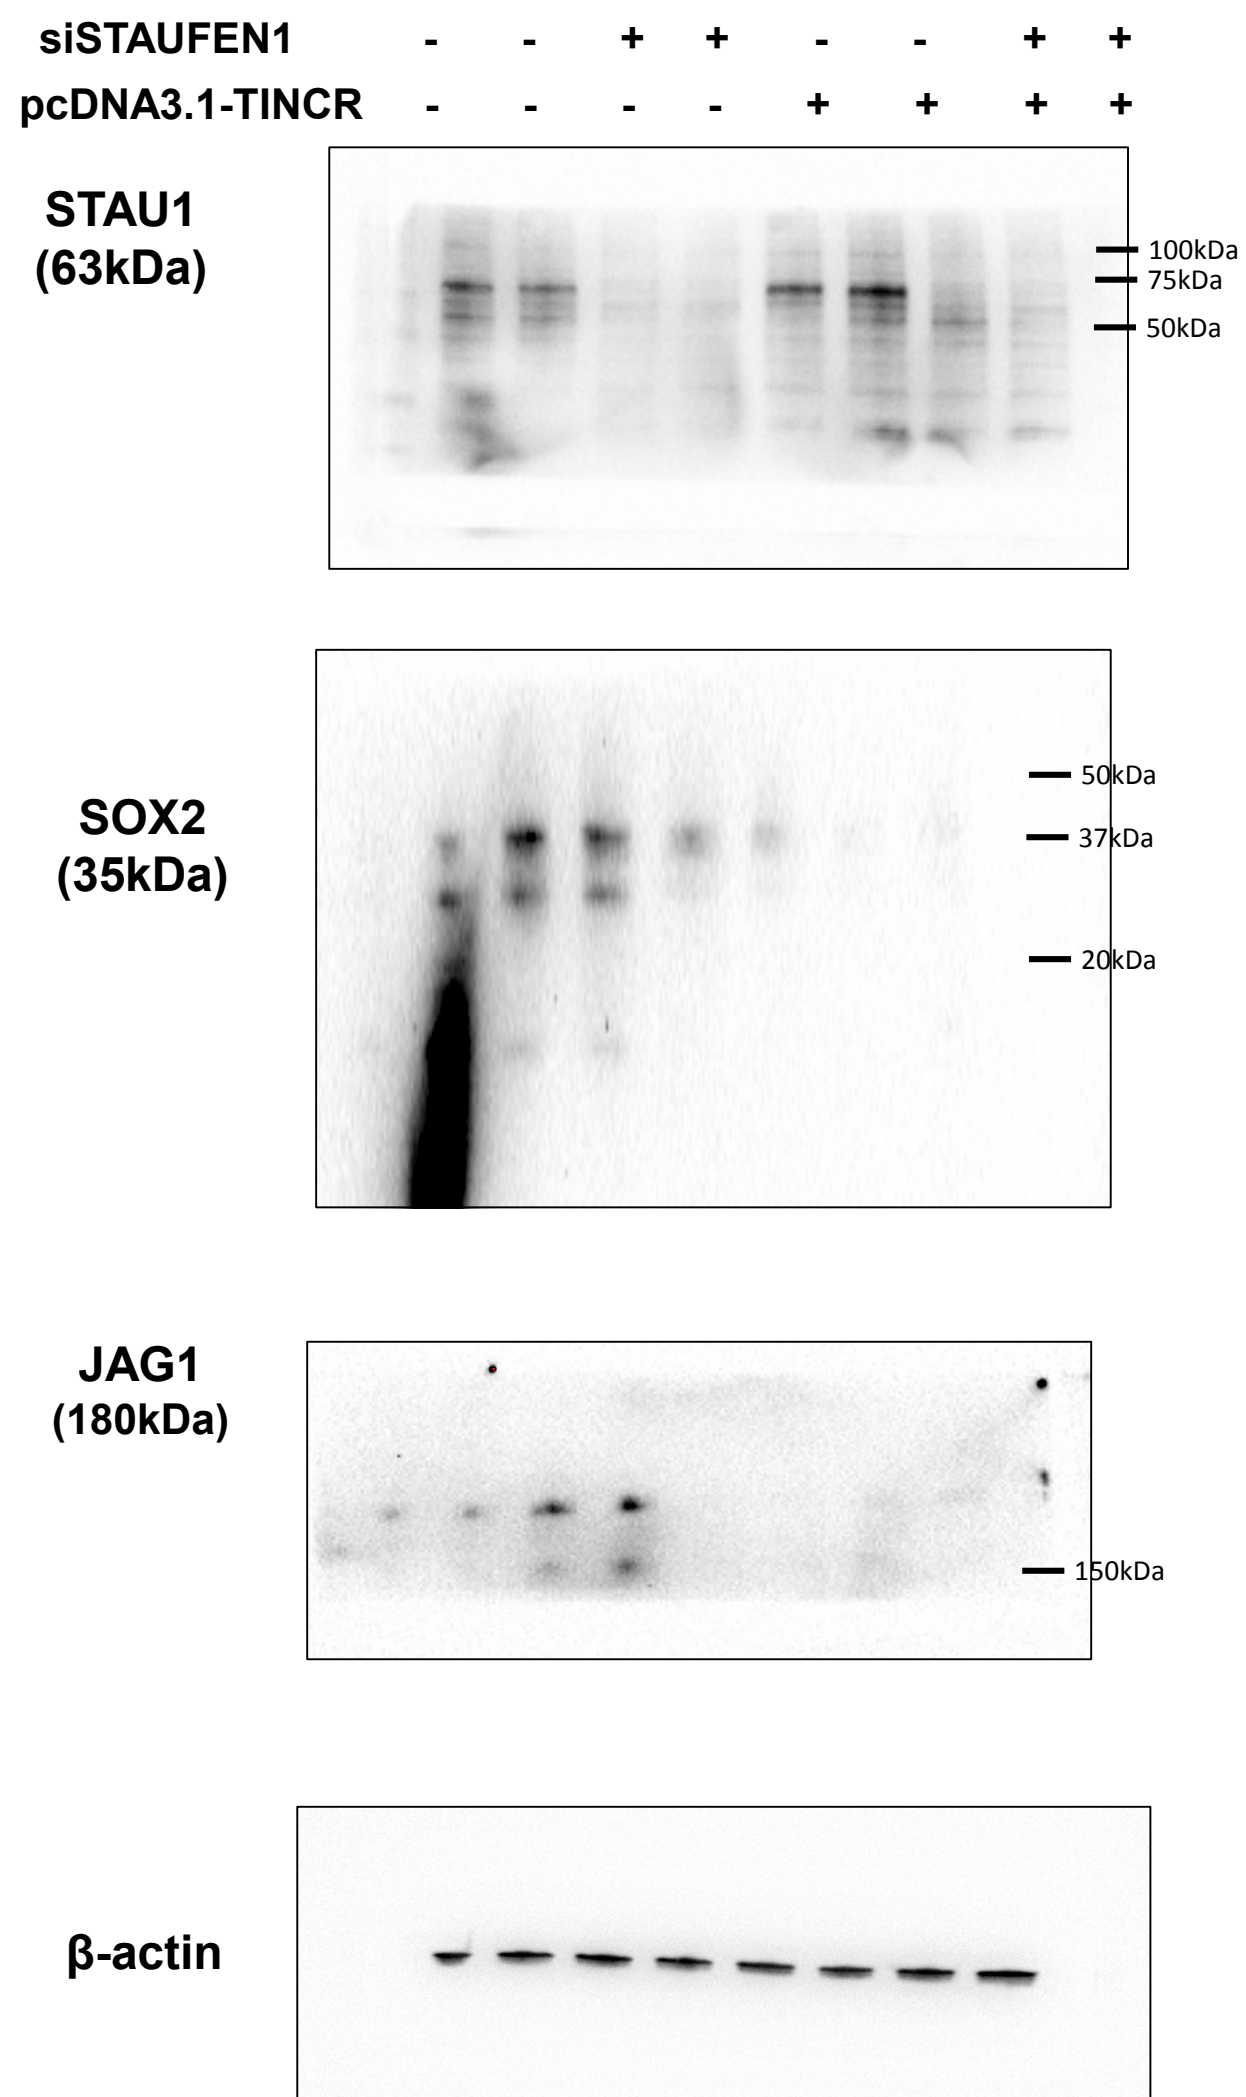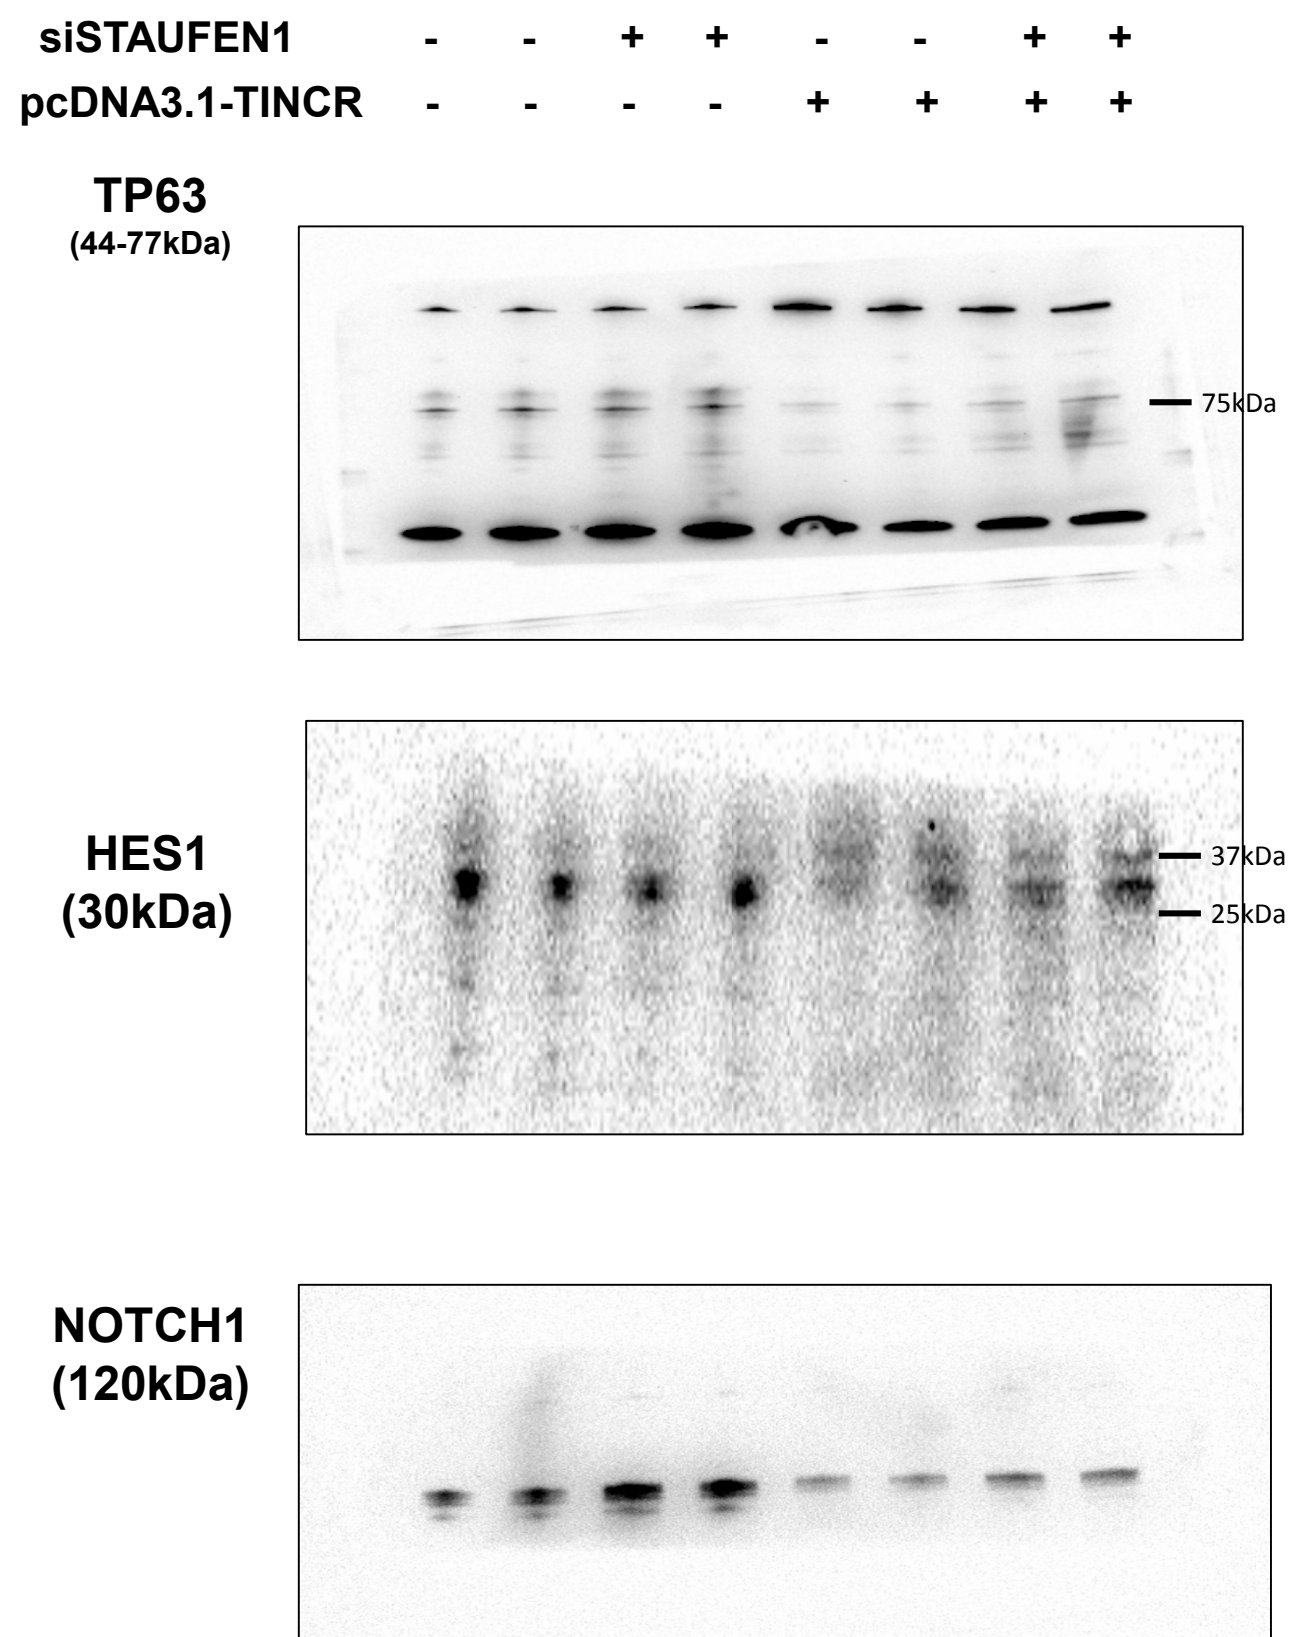

Supplement: PHY2-9-e14727-s001.pdf [file PHY2-9-e14727-s001.pdf]
